# Supplementary material
Source: JCI journal article supplement (doi:10.1172/jci171815)
Supplement: sd1 [file 1]

## SUPPLEMENTAL FIGURES

### Uric acid formation is driven by crosstalk between skeletal muscle and other cell types

Spencer G. Miller<sup>1,2,3</sup>, Catalina Matias<sup>1,2</sup>, Paul S. Hafen<sup>1,2</sup>, Andrew S. Law<sup>1,2</sup>, Carol A. Witczak<sup>1,2</sup>, Jeffrey J. Brault<sup>1,2,\*</sup>

<sup>1</sup>Indiana Center for Musculoskeletal Health, Indiana University School of Medicine, Indianapolis, IN, USA

<sup>2</sup>Department of Anatomy, Cell Biology & Physiology, Indiana University School of Medicine, Indianapolis, IN, USA

<sup>3</sup>Department of Kinesiology, East Carolina University, Greenville, NC, USA

**\*Correspondence:**

Jeffrey J. Brault, PhD  
Dept. of Anatomy, Cell Biology & Physiology  
Indiana University School of Medicine  
635 Barnhill Dr., MS 5035  
Indianapolis, IN 46202  
USA  
Email: [jebrault@iu.edu](mailto:jebrault@iu.edu)  
Phone: 1-317-278-2623

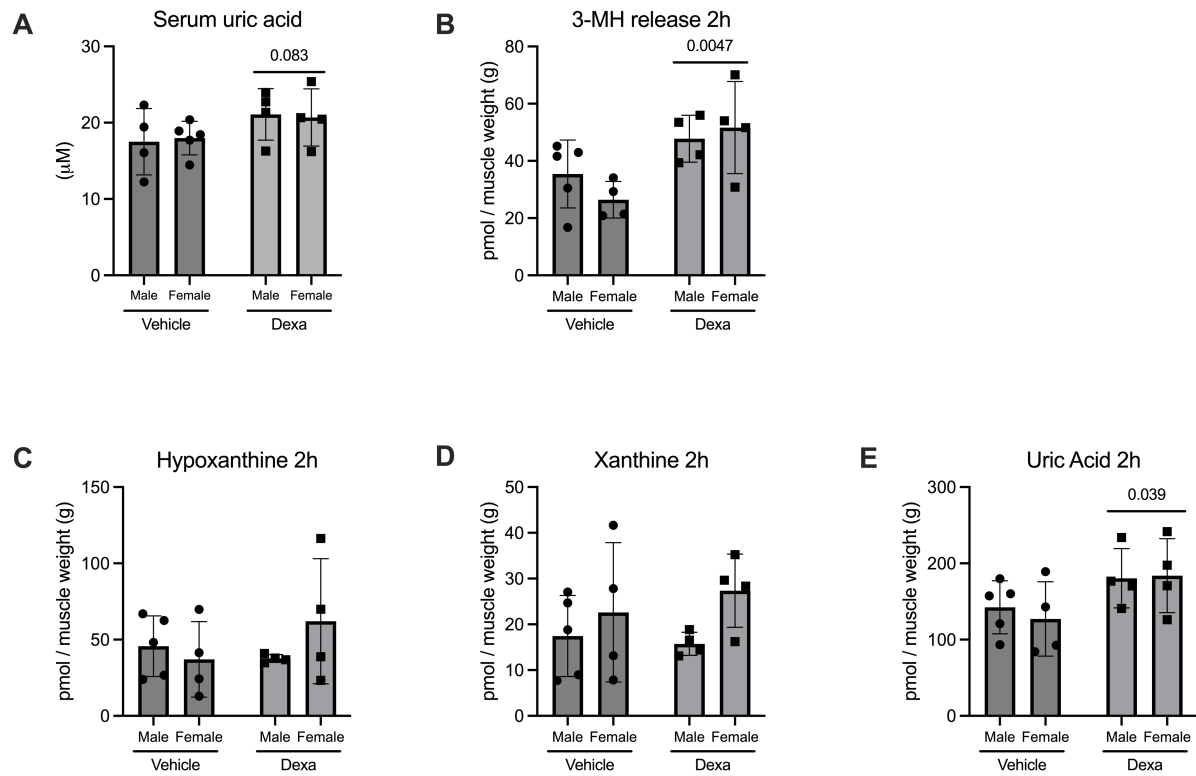

**Supplemental Figure 1. Sex does not influence serum uric acid levels or uric acid release from muscles of glucocorticoid treated mice.** Male and female C57BL/6J mice were treated with dexamethasone (Dexa; 5mg/kg) or vehicle for 5 days. (A) Serum was tested for uric acid. EDL muscles were incubated for 2h and media tested for (B) 3-methylhistidine, (C) hypoxanthine, (D) xanthine, and (E) uric acid. Two-way ANOVA: sex by treatment. No main effects of sex. P values in panels are main effects of Dexa

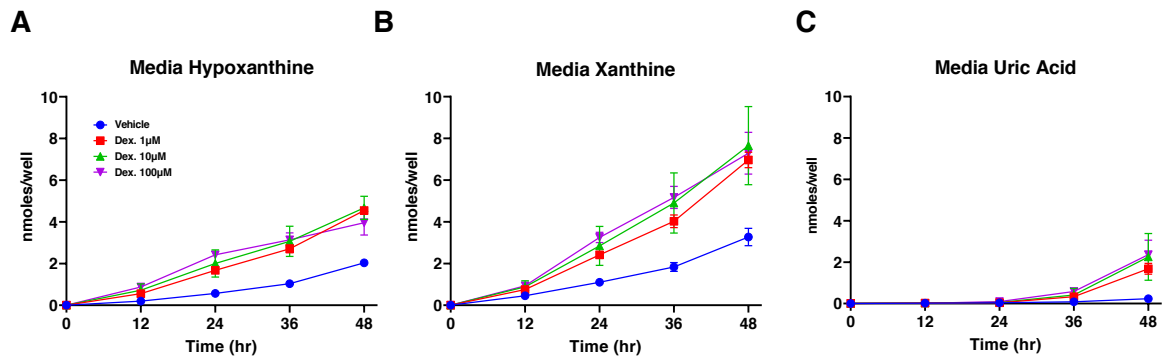

**Supplemental Figure 2.** C2C12 media accumulation of the purine nucleotide breakdown products hypoxanthine (A), xanthine (B) and uric acid (C) during 48h treatment with vehicle, 1, 10, or 100  $\mu$ m dexamethasone (DEX).

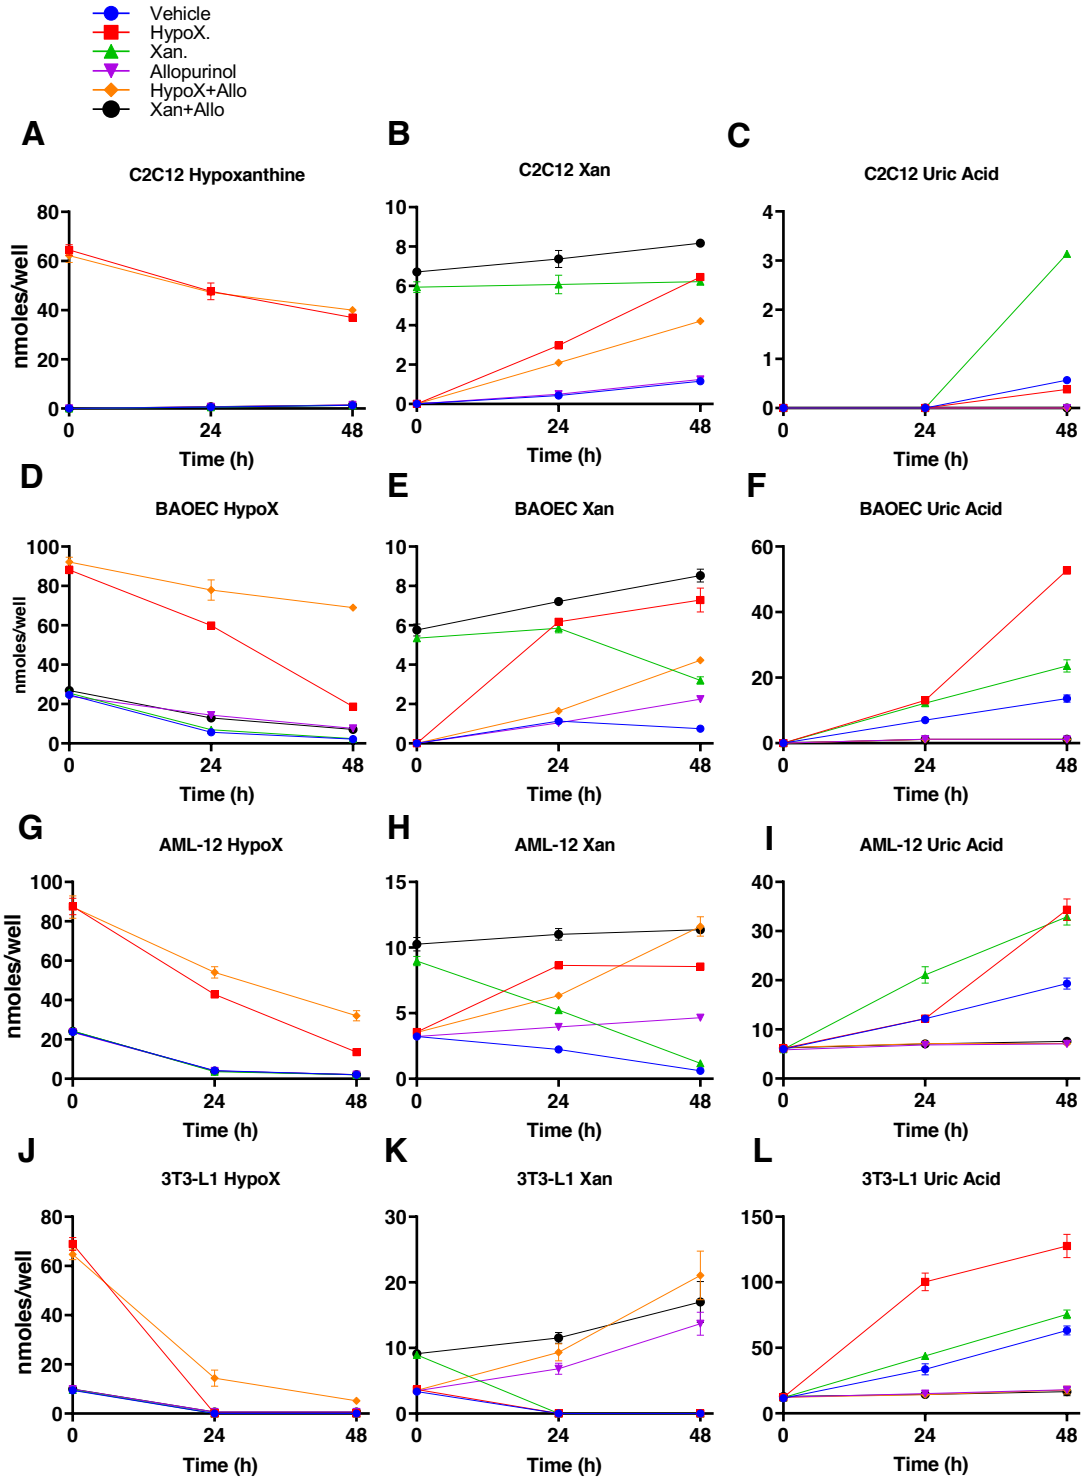

**Supplemental Figure 3.** Media accumulation of hypoxanthine, xanthine, and uric acid in cultured myotubes (C2C12), bovine aortic endothelial cells (BAOEC), adipocytes (3T3-L1), and hepatocytes (AML-12). Cells were treated for 48 h with vehicle, 50  $\mu$ M hypoxanthine, 10  $\mu$ M xanthine,  $\pm$  100  $\mu$ M allopurinol.
